# Supplementary material
Source: PubMed Central journal article supplement (PMC2666993)
Supplement: 0811968106_ST1_PDF.pdf [file 0811968106_ST1_PDF.pdf]

**Table S1. Effects of common cofactors on granzyme C activity**

| Metal ions                                                | Concentrations       |
|-----------------------------------------------------------|----------------------|
| NaCl, KCl, LiCl                                           | 0.2–200 mM           |
| CaCl <sub>2</sub> , MgCl <sub>2</sub>                     | 0.12–250 mM          |
| CoCl <sub>2</sub> , NiCl <sub>2</sub>                     | 24 nM–50 mM          |
| ZnCl <sub>2</sub>                                         | 2.4 nM–5 mM          |
| CuCl <sub>2</sub>                                         | 12 nM–25 mM          |
| Glycosaminoglycans                                        | Range tested         |
| Heparin sulfate (average molecular mass 3 kDa and 18 kDa) | 5:1–100:1            |
| Heparan sulfate (average molecular mass 7.5 kDa)          | 5:1–100:1            |
| Mixed molecular mass heparan sulfate                      | 5:1–100:1            |
| Chondroitin sulfate A, B and C                            | 5:1–100:1            |
| Extracellular matrices                                    | Concentration tested |
| Laminin                                                   | 2 µg/mL              |
| Fibronectin                                               | 10 µg/mL             |
| Vitronectin                                               | 10 µg/mL             |
